# Supplementary material
Source: HighWire-hosted journal article supplement (http://thorax.bmjjournals.com/highwire/filestream/173990/field_highwire_adjunct_files/2/62121088webonlyapp3.pdf)
Supplement: 62121088webonlyapp3.pdf [file 62121088webonlyapp3.pdf]

**Supplementary Table 2.** Excess relative risks (95% credible intervals) by exposure window for respiratory mortality, black smoke and sulphur dioxide, all mortality periods combined, adjusted for deprivation and urban/rural status, for age 65+ years.

| Exposure window (years) | Black smoke (per 10 $\mu\text{g}/\text{m}^3$ ) |            | Sulphur dioxide (ppb)    |              |
|-------------------------|------------------------------------------------|------------|--------------------------|--------------|
|                         | Excess Relative Risk (%)                       | (95% CI)   | Excess Relative Risk (%) | (95% CI)     |
| 0-4                     | 3.9                                            | (2.8, 4.9) | 14.6                     | (12.7, 16.3) |
| 5-8                     | 3.2                                            | (2.5, 3.9) | 11.4                     | (9.9, 12.8)  |
| 9-12                    | 1.9                                            | (1.5, 2.4) | 8.1                      | (7.1, 9.1)   |
| 13-16                   | 1.1                                            | (0.8, 1.4) | 5.0                      | (4.3, 5.7)   |
| 0-8                     | 2.0                                            | (1.5, 2.4) | 7.1                      | (6.3, 7.9)   |
| 0-12                    | 1.1                                            | (0.9, 1.3) | 4.3                      | (3.8, 4.8)   |
| 0-16                    | 0.6                                            | (0.5, 0.7) | 2.6                      | (2.3, 2.9)   |
